# Supplementary material for: Hydrogen bonds in “push-pull” enamines
Source: Royal Society of Chemistry journal article supplement (doi:10.1039/b409254f), 2004-01-01
Supplement: b409254f.pdf [file b409254f.pdf]

## Supplementary data

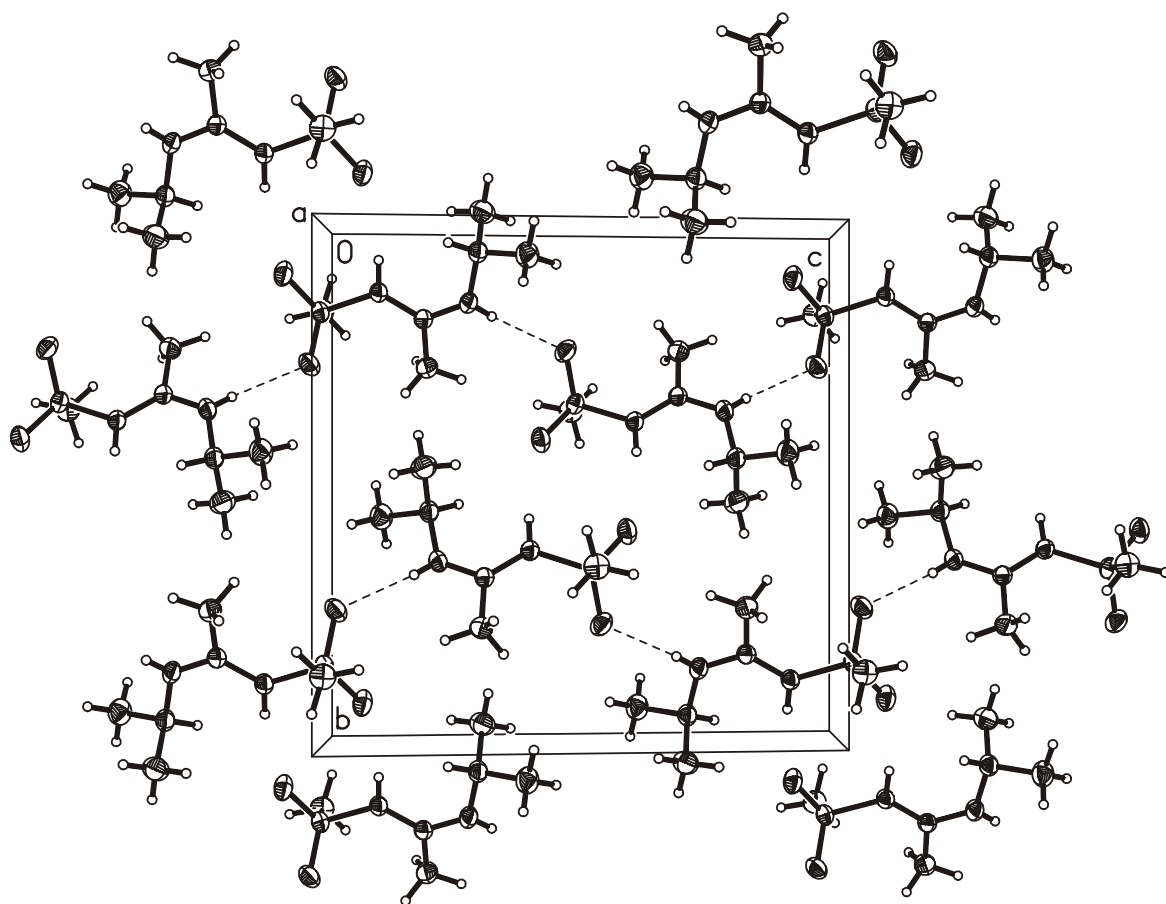

**Fig. S1.** The view of a crystal packing of **8** shown along the a-axis. Molecules form infinite hydrogen-bonded chains along the c-axis. The chains are interlinked with weak C(2)-H(2)⋯O(1) hydrogen bonds passing in perpendicular direction (not shown in the drawing).

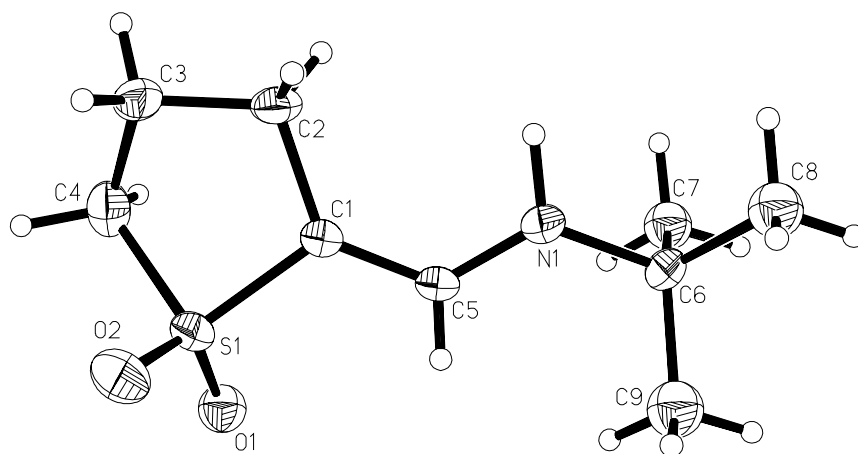

Fig S2. X-ray derived geometry of the sulphone **15**
